# Supplementary material
Source: PubMed Central journal article supplement (PMC2882132)

**A**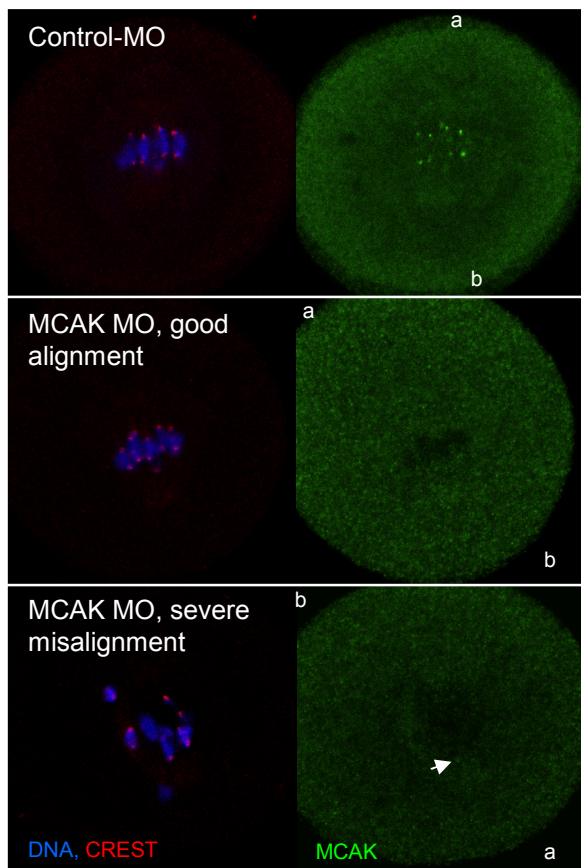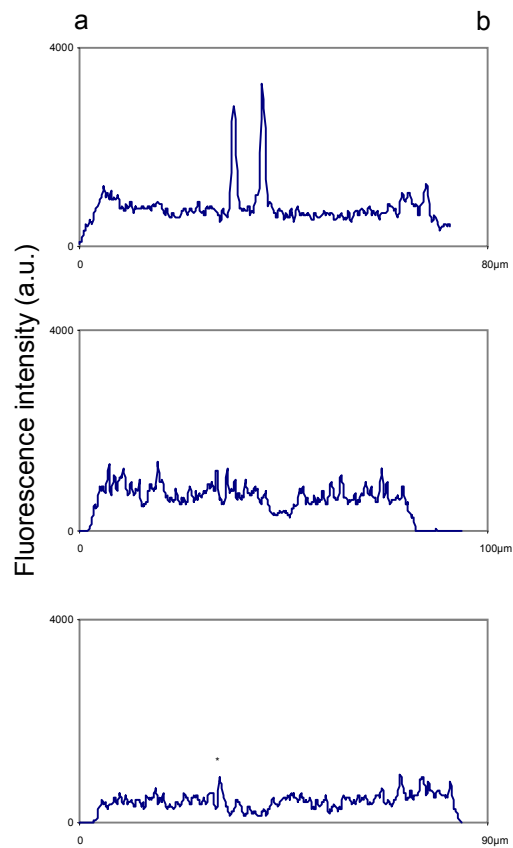**B**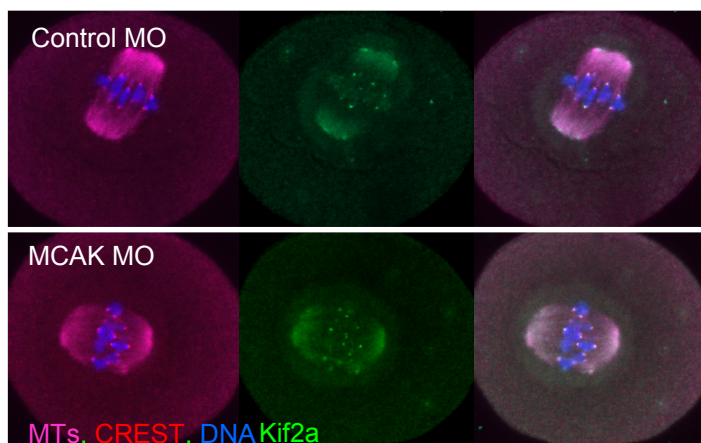

Supplement: supp_137.13.2133_048306FigS1.pdf [file supp_137.13.2133_048306FigS1.pdf]

Control-GFP

MCAK-GFP

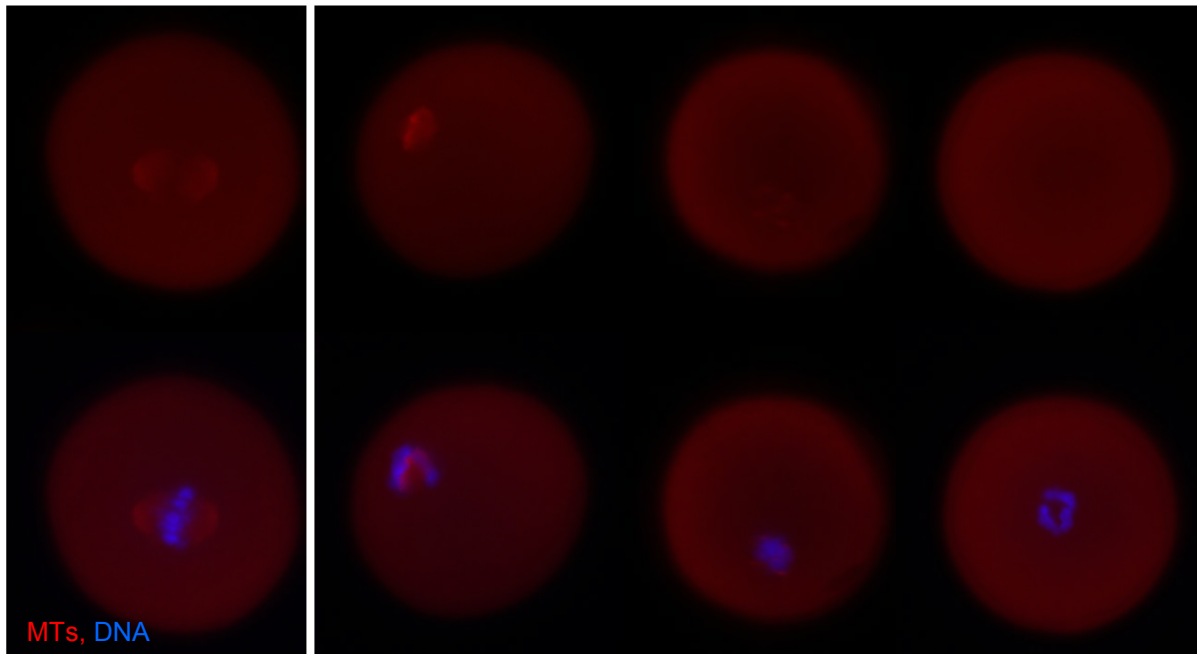

Supplement: supp_137.13.2133_048306FigS2.pdf [file supp_137.13.2133_048306FigS2.pdf]

**A**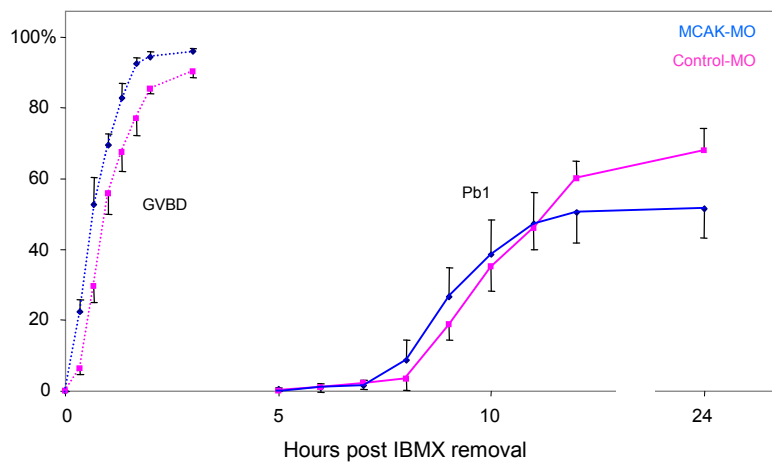**B**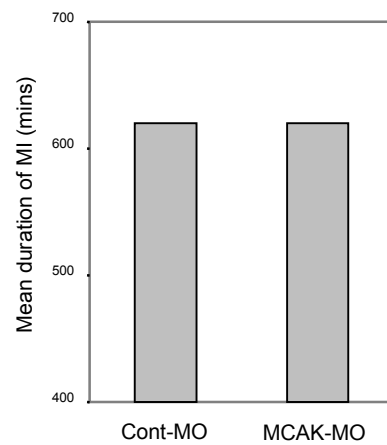**C**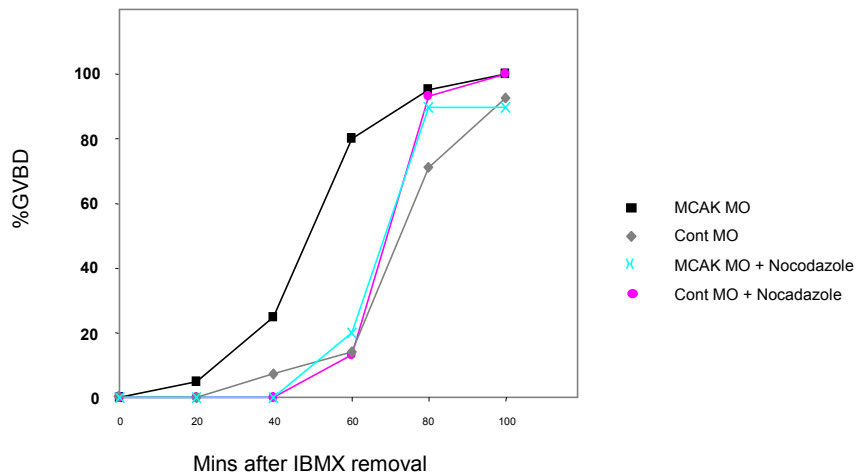

Supplement: supp_137.13.2133_048306FigS3.pdf [file supp_137.13.2133_048306FigS3.pdf]

A

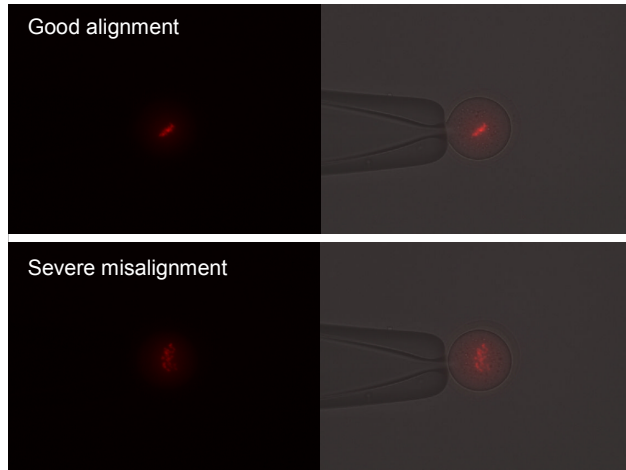

B

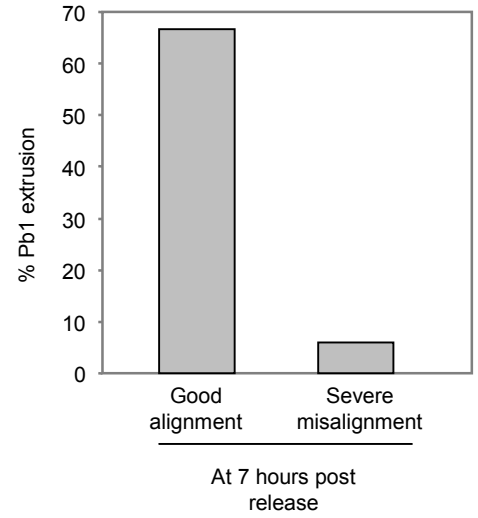

C

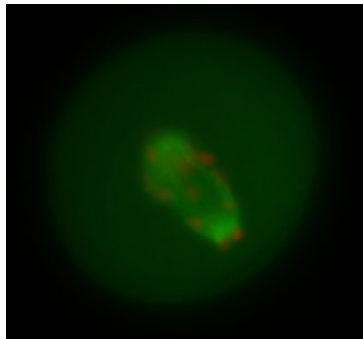

Supplement: supp_137.13.2133_048306FigS4.pdf [file supp_137.13.2133_048306FigS4.pdf]

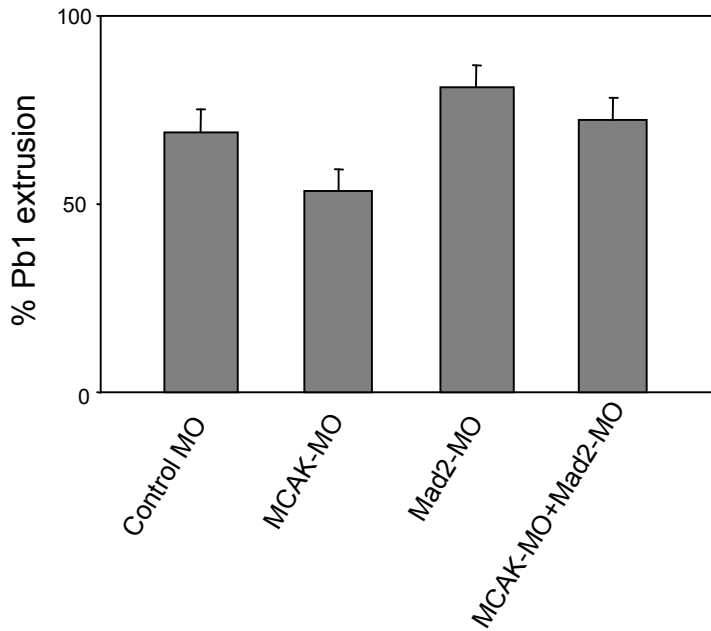

Supplement: supp_137.13.2133_048306FigS5.pdf [file supp_137.13.2133_048306FigS5.pdf]

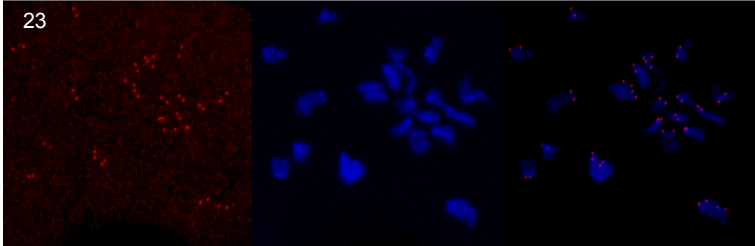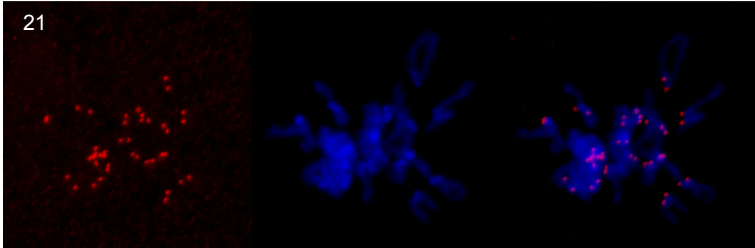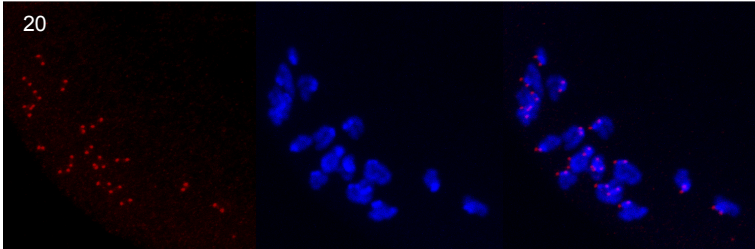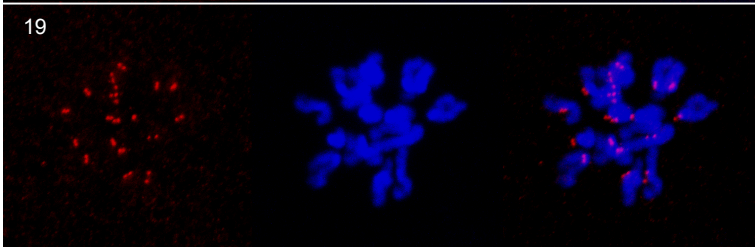

Supplement: supp_137.13.2133_048306FigS6.pdf [file supp_137.13.2133_048306FigS6.pdf]

A

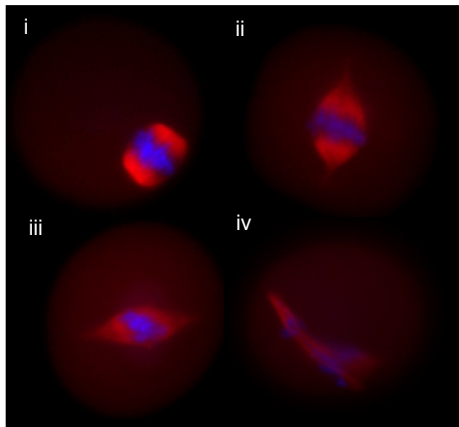

B

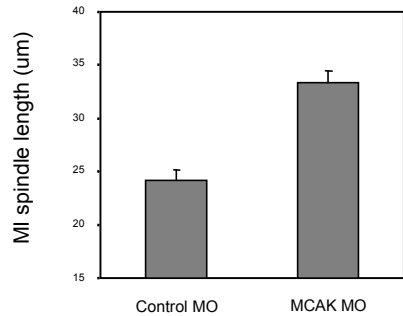

Supplement: supp_137.13.2133_048306FigS7.pdf [file supp_137.13.2133_048306FigS7.pdf]
